# Supplementary material for: Tailoring nanostructured NiFe-LDH catalysts via ammonium fluoride-mediated hydrothermal synthesis: enhanced electrocatalytic performance in oxygen evolution reactions
Source: Royal Society of Chemistry journal article supplement (doi:10.1039/d4ce01298d), 2025-01-01
Supplement: d4ce01298d1.pdf [file d4ce01298d1.pdf]

Supporting Information for

**Tailoring Nanostructured NiFe-LDH Catalysts via Ammonium Fluoride-Mediated Hydrothermal Synthesis: Enhanced Electrocatalytic Performance in Oxygen Evolution Reaction**

Xinyi Feng<sup>a b d</sup>, Xiaodong Hao<sup>b \*</sup>, Xuan Zhao<sup>c</sup>, Yangchun Guo<sup>c</sup>, Shufang Ma<sup>b</sup>, Bingshe Xu<sup>b</sup>, Hui Liu<sup>a, \*</sup>, Bo Gao<sup>d \*</sup>

<sup>a</sup> *School of Materials Science and Engineering, Shaanxi University of Science & Technology, Xi'an 710021, China*

<sup>b</sup> *Xi'an Key Laboratory of Compound Semiconductor Materials and Devices, School of Physics & Information Science, Shaanxi University of Science & Technology, Xi'an 710021, China*

<sup>c</sup> *Shaanxi Key Laboratory of Chemical Additives for Industry, College of Chemistry and Chemical Engineering, Shaanxi University of Science & Technology, Xi'an 710021, China*

<sup>d</sup> *Institute of Orthopaedic Surgery, Xijing Hospital, Air Force Military Medical University, Xi'an 710032, China.*

\*Corresponding author:

[hao.xiaodong@sust.edu.cn](mailto:hao.xiaodong@sust.edu.cn) ; [liuhui@sust.edu.cn](mailto:liuhui@sust.edu.cn) ; [gaobofmmu@hotmail.com](mailto:gaobofmmu@hotmail.com)

## 1. Experimental Section

### 1.1 Chemical and Materials.

Nickel nitrate hexahydrate ( $\text{Ni}(\text{NO}_3)_2 \cdot 6\text{H}_2\text{O}$ ), iron nitrate nonahydrate ( $\text{Fe}(\text{NO}_3)_3 \cdot 9\text{H}_2\text{O}$ ), urea ( $\text{CH}_4\text{N}_2\text{O}$ ), ammonium fluoride ( $\text{NH}_4\text{F}$ ), potassium hydroxide ( $\text{KOH}$ ), and a 5% Nafion solution were all purchased from Aladdin Chemical Reagent Company. Deionized water was collected via a purification system. All reagents were used as received without further purification.

### 1.2 Preparation of NiFe-LDH via a one-step hydrothermal method.

A 0.2 M solution of  $\text{Ni}(\text{NO}_3)_2 \cdot 6\text{H}_2\text{O}$ , a 0.05 M solution of  $\text{Fe}(\text{NO}_3)_3 \cdot 9\text{H}_2\text{O}$ , and a 1.25 M solution of urea were each mixed thoroughly in 10 ml, followed by the addition of different volumes of 2.5 M  $\text{NH}_4\text{F}$  solution and the appropriate amount of deionized water to achieve a total solution volume of 40 ml. The well-mixed solution was transferred to a stainless-steel autoclave lined with polytetrafluoroethylene and subjected to hydrothermal treatment at 120 °C for 12 hours. After cooling to room temperature, the resulting material was washed several times with deionized water and anhydrous ethanol, followed by overnight drying at 60°C to obtain the composite material. The obtained samples were named NFL- $x\text{F}$  (where  $x$  represents the amount of  $\text{NH}_4\text{F}$  added, corresponding to 0, 1, 3, 5, 7, and 9 times the concentration of  $\text{Fe}^{3+}$  ions). Under the same conditions,  $\beta\text{-Ni}(\text{OH})_2$  and  $\beta\text{-FeOOH}$  were prepared as the control samples by omitting either the Fe precursor or the Ni precursor.

### 1.3 Materials characterizations.

The crystalline structure of the as-synthesized samples was investigated using X-ray diffraction (XRD) with a Bruker D8 X-ray diffractometer equipped with a Cu target  $K\alpha$  radiation source. The morphology of the samples was observed using scanning electron microscopy (SEM) with a Hitachi S-800 instrument. The microstructure and crystal structure of the samples were examined using transmission electron microscopy (TEM) with a JEOL-JEM 2100 Plus instrument, and high-resolution TEM characterization was conducted using a double spherical aberration-corrected transmission electron microscope (JEOL-ARM 300F) in TEM mode. X-ray photoelectron spectroscopy (XPS) was employed to study the binding energies of Ni 2p, Fe 2p, and O 1s in different samples, with binding energy calibrated using C 1s (284.8 eV) and elemental valence state changes simulated using Avantage software. Fourier-transform infrared spectroscopy (FT-IR) characterization was performed as well.

#### *1.4 Electrochemical tests.*

The electrochemical performance of the samples was tested using a standard three-electrode system on an electrochemical workstation (Shanghai Chenhua, CHI660E). The three electrodes consisted of a working electrode (glassy carbon electrode loaded with active material, diameter 0.3 cm), a reference electrode (Ag/AgCl in 3 M KCl solution), and a counter electrode (platinum wire). The electrolyte used during testing was a 1 M KOH solution, and prior to testing, high-purity nitrogen gas was continuously bubbled into the electrolyte for 30 minutes to remove oxygen. The electrode activation process was conducted using cyclic voltammetry (CV) with a scan range of  $-0.1$  V to  $0.9$  V at a scan rate of  $5 \text{ mV}\cdot\text{s}^{-1}$  until the electrode reached a steady

state. Subsequently, linear sweep voltammetry (LSV) was performed at a scan rate of  $1 \text{ mV} \cdot \text{s}^{-1}$ . Electrochemical impedance spectroscopy was conducted over a frequency range from 100 kHz to 0.1 Hz, and 85% iR compensation was applied to all polarization curves to correct for solution resistance. Furthermore, all potentials were converted to the reversible hydrogen electrode (RHE) scale using the Nernst equation:

$$E_{\text{RHE}} = E_{\text{Ag/AgCl}} + 0.0592 \times \text{pH} + E_{0\text{Ag/AgCl}}$$

where  $E_{\text{RHE}}$  represents the potential relative to RHE,  $E_{\text{Ag/AgCl}}$  is the experimental potential measured relative to Ag/AgCl,  $E_{0\text{Ag/AgCl}}$  is the standard potential of the Ag/AgCl reference electrode at room temperature ( $25 \pm 1 \text{ }^{\circ}\text{C}$ ), measured as 0.195 V in this work. The stability of the electrodes was evaluated through chronoamperometry at a current density of  $120 \text{ mA} \cdot \text{cm}^{-2}$ .

## Supplementary Figures

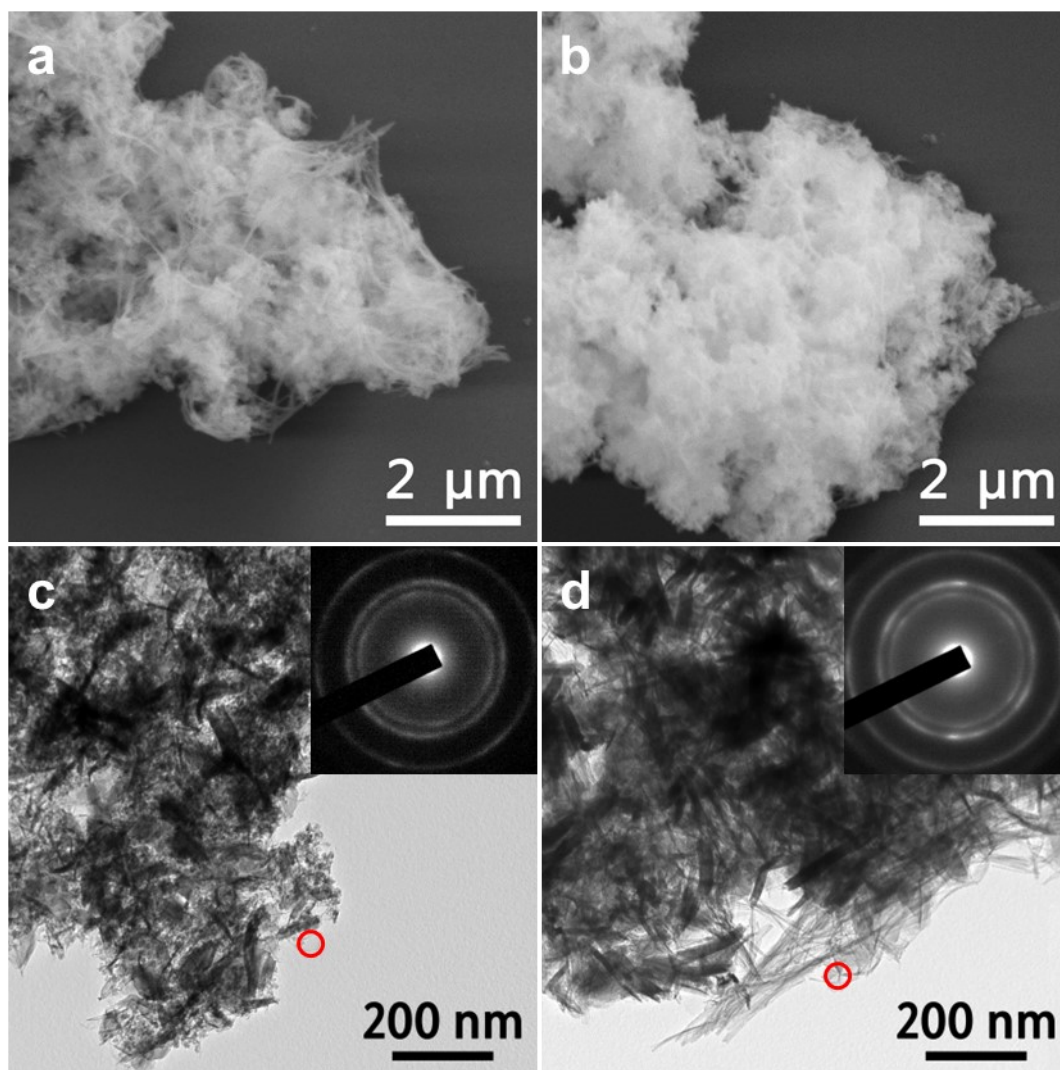

**Figure S1.** SEM image, TEM image and insert the FFT pattern of (a, c) NFL-0F, (b, d) NFL-1F.

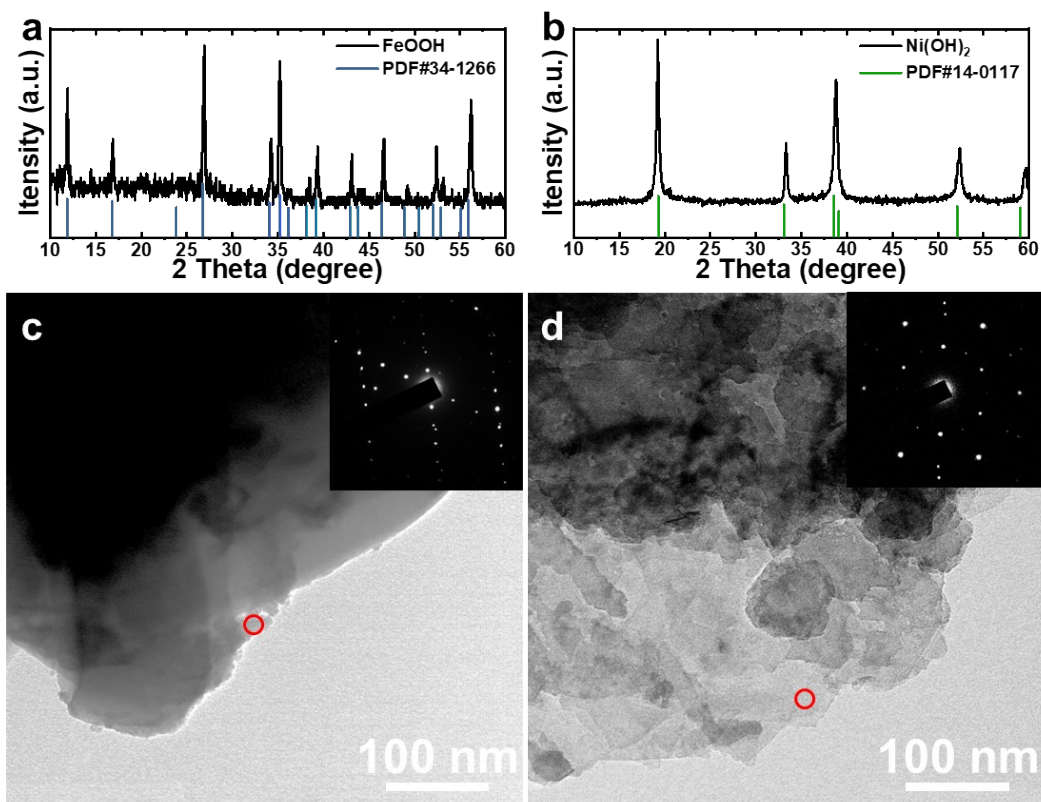

**Figure S2.** XRD patterns of (a)  $\beta$ -Ni(OH)<sub>2</sub> and (b)  $\beta$ -FeOOH; TEM image and insert the FFT pattern of (c)  $\beta$ -Ni(OH)<sub>2</sub>, (d)  $\beta$ -FeOOH.

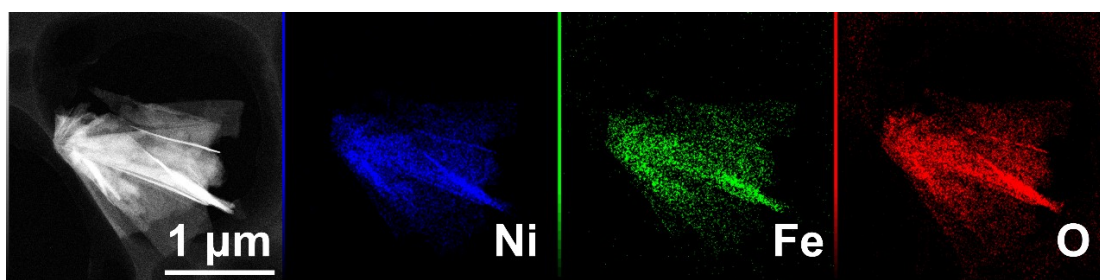

**Figure S3.** The EDS elemental mapping of the Ni *K*-edge, Fe *L*-edge and O *K*-edge of NFL-7F.

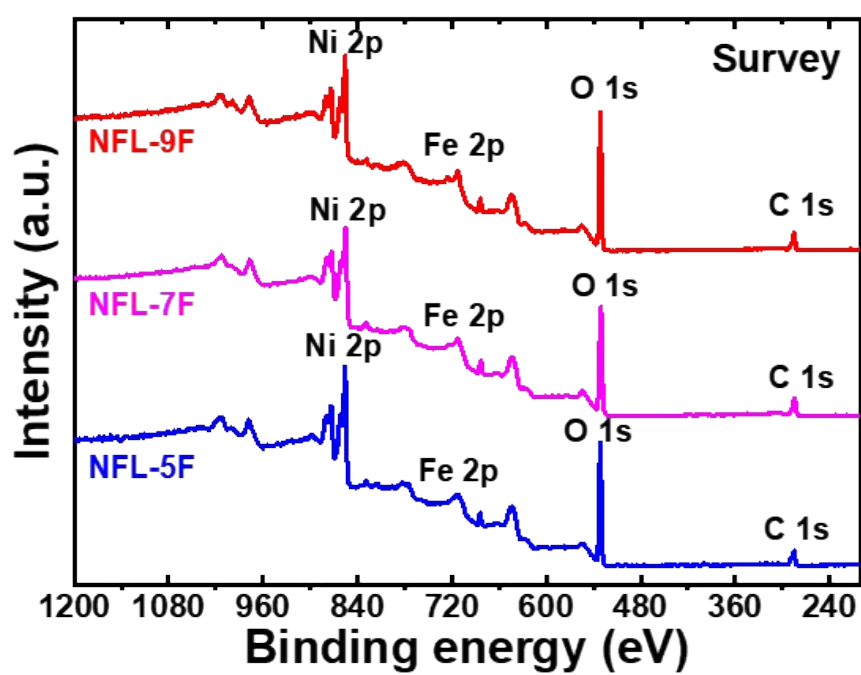

**Figure S4.** The XPS survey spectra of NFL-5F, NFL-7F and NFL-9F.

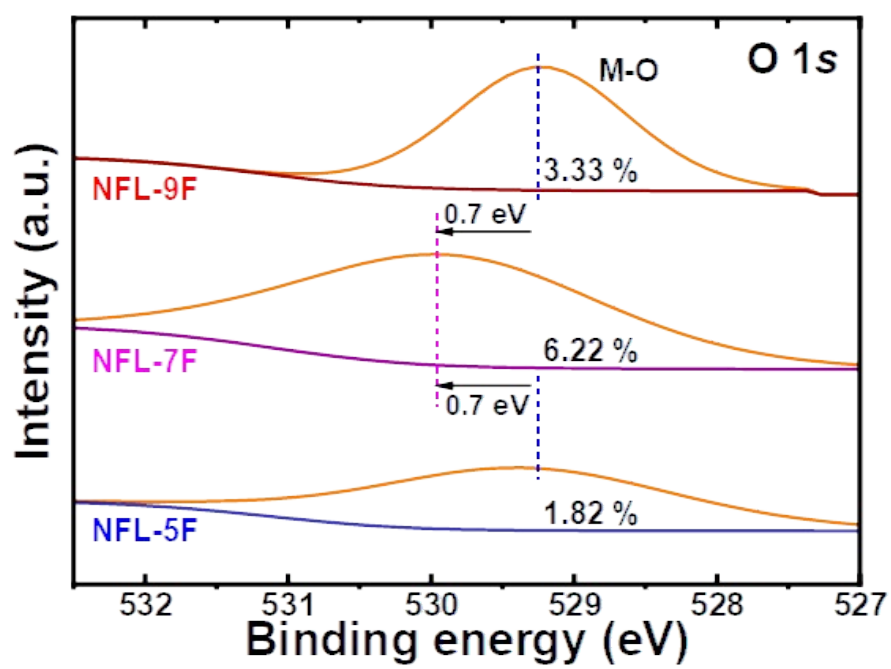

**Figure S5.** Comparison of M-O bonds of O1s in XPS spectra of NFL-5F, NFL-7F and NFL-9F.

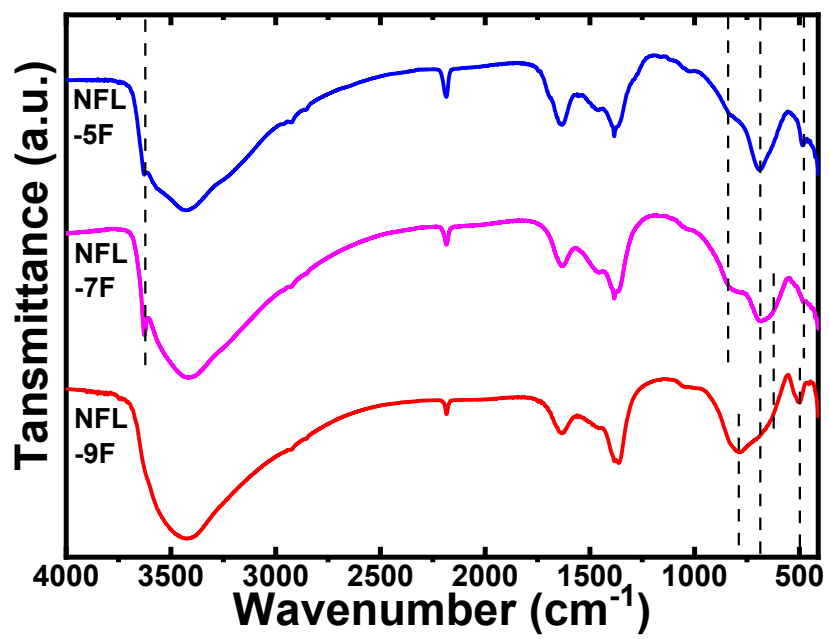

**Figure S6.** FT-IR spectra of NFL-5F, NFL-7F and NFL-9F.

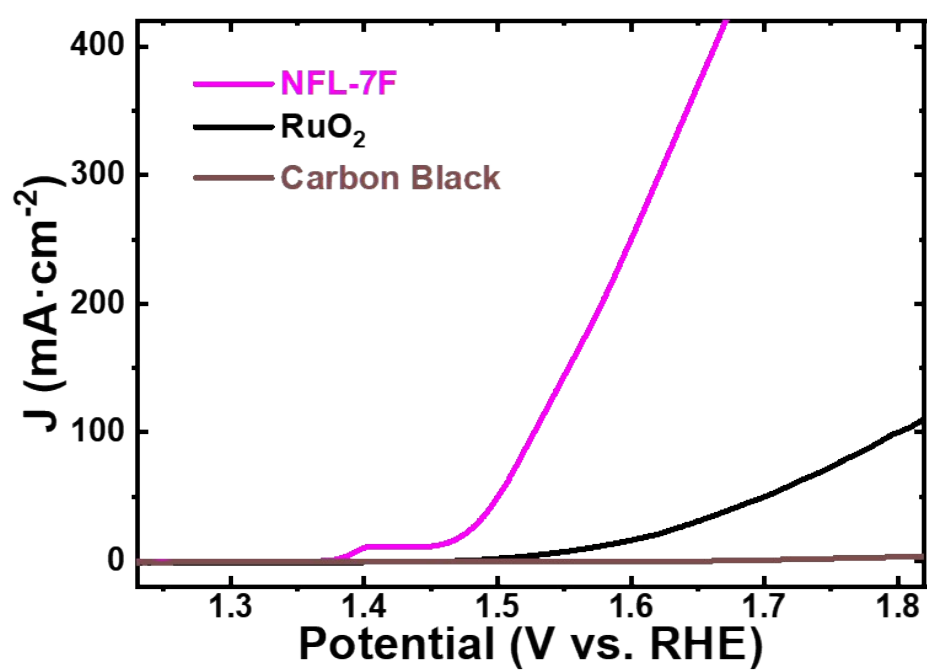

**Figure S7.** LSVs of NFL-7F,  $\text{RuO}_2$  and Carbon Black for catalyzing OER in 1.0 M KOH

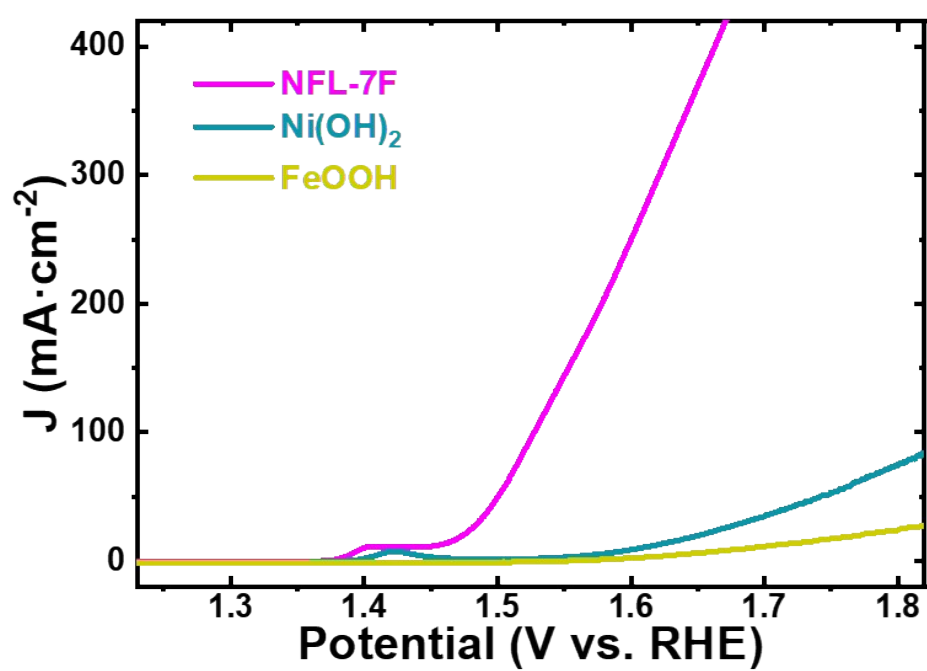

**Figure S8.** LSVs of NFL-7F,  $\beta$ -Ni(OH)<sub>2</sub> and  $\beta$ -FeOOH for catalyzing OER in 1.0 M KOH

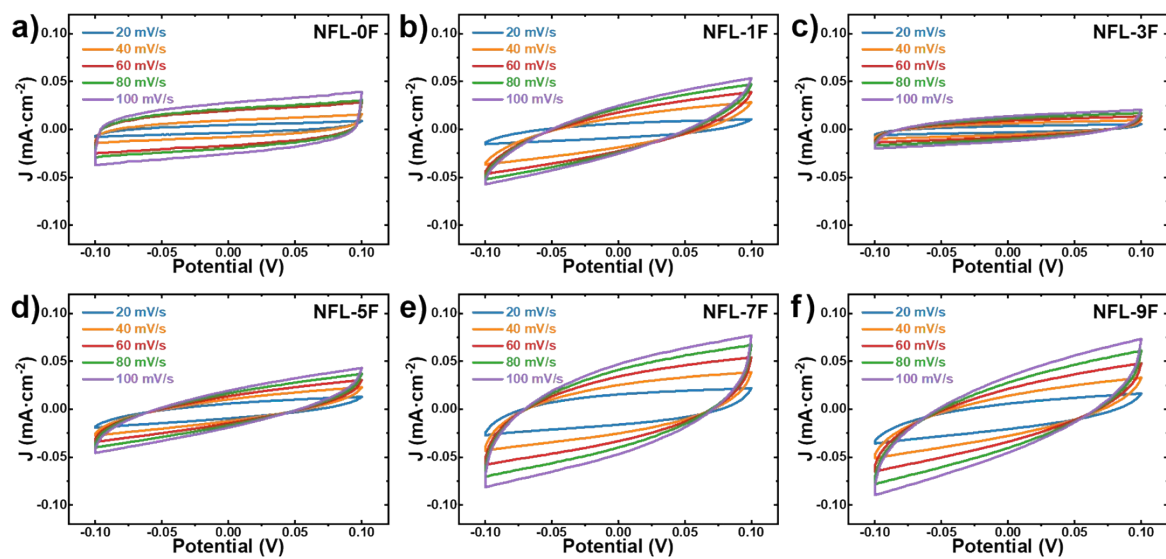

**Figure S9.** CV curves at different scan rates for (a) NFL-0F, (b) NFL-1F, (c) NFL-3F, (d) NFL-5F, (e) NFL-7F, and (f) NFL-9F.

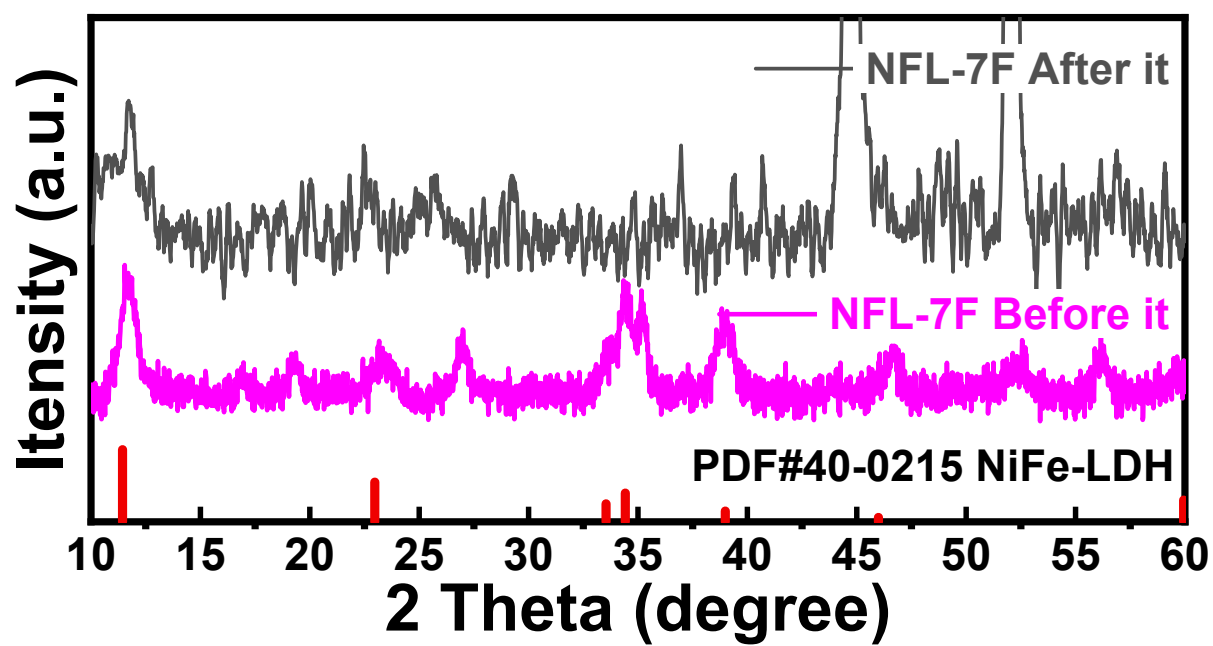

**Figure S10.** Comparison of XRD characterization profiles before and after it test.

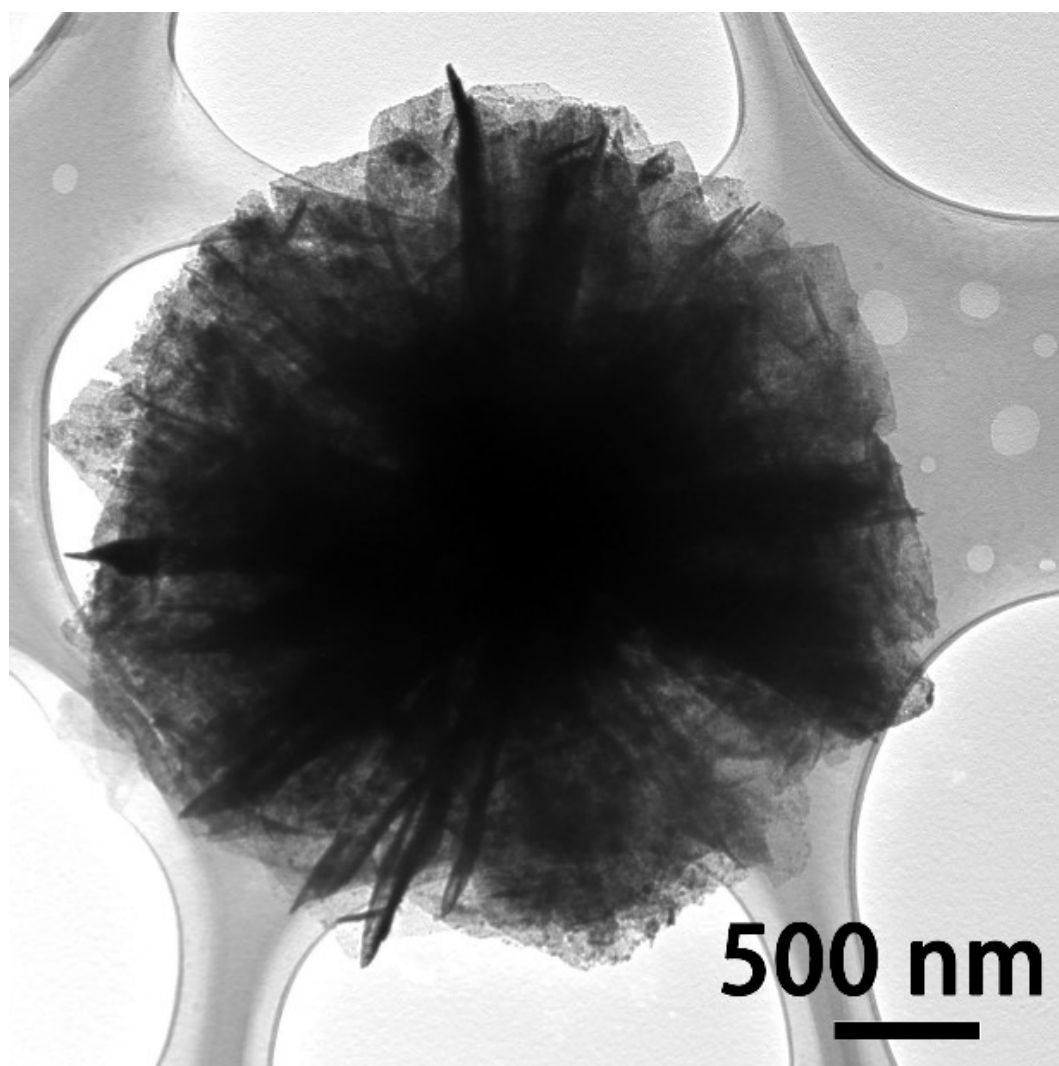

**Figure S12.** TEM image of NFL-7F after it test.

**Table S1.** Comparison with reported state-of-the-art catalysts for the oxygen evolution reaction.

| Catalyst                                    | Overpotential at 50 mA·cm <sup>-2</sup> (mV) | Tafel slope (mV·dec <sup>-1</sup> ) | References       |
|---------------------------------------------|----------------------------------------------|-------------------------------------|------------------|
| Ni <sup>vac</sup> Fe <sup>vac</sup> -LDH    | 310                                          | 52                                  | [1]              |
| NiFe-25°                                    | 330                                          | 48.7                                | [2]              |
| NiFe <sub>III</sub> (1:1)                   | 382                                          | 31.1                                | [3]              |
| NiFe-LDH pyramid electrode                  | 310                                          | 66                                  | [4]              |
| r-NiFe LDH                                  | 320                                          | 83                                  | [5]              |
| PR-NiFe LDH                                 | 330                                          | 75                                  | [6]              |
| NiFe25/PGS                                  | 362                                          | 33                                  | [7]              |
| 10-NiFe LDH/CNTs                            | 280                                          | 30                                  | [8]              |
| NiFe LDH-Ni(III)Li                          | 280                                          | 35                                  | [9]              |
| Ni-BDC@NiFe-LDH-2                           | 310                                          | 45                                  | [10]             |
| Ni <sub>2</sub> Fe <sub>1</sub> -LDH/rGO/NF | 300                                          | 37.9                                | [11]             |
| MIL-101@NiFe-LDH                            | 340                                          | 61.1                                | [12]             |
| NiFe-LDH-Ti <sub>4</sub> O <sub>7</sub>     | 350                                          | 35                                  | [13]             |
| Ni/LDH-ZnO (2 min)                          | 310                                          | 57                                  | [14]             |
| NFO/3DGN-10                                 | 355                                          | 64                                  | [15]             |
| <b>NFL-7F</b>                               | <b>270</b>                                   | <b>68.1</b>                         | <b>This work</b> |

## References

- (1) Peng, L.; Yang, N.; Yang, Y.; Wang, Q.; Xie, X.; Sun-Waterhouse, D.; Shang, L.; Zhang, T.; Waterhouse, G. I. N., Atomic Cation-Vacancy Engineering of NiFe-Layered Double Hydroxides for Improved Activity and Stability towards the Oxygen Evolution Reaction. *Angew. Chem. Int. Ed.* **2021**, *60* (46), 24612-24619.
- (2) Rinawati, M.; Wang, Y.-X.; Chen, K.-Y.; Yeh, M.-H., Designing a spontaneously deriving NiFe-LDH from bimetallic MOF-74 as an electrocatalyst for oxygen evolution reaction in alkaline solution. *Chem. Eng. J.* **2021**, *423*, 130204.
- (3) Huang, F.; Yao, B.; Huang, Y.; Dong, Z., NiFe layered double hydroxide nanosheet arrays for efficient oxygen evolution reaction in alkaline media. *Int. J. Hydrogen Energy* **2022**, *47* (51), 21725-21735.
- (4) Ahn, J.; Park, Y. S.; Lee, S.; Yang, J.; Pyo, J.; Lee, J.; Kim, G. H.; Choi, S. M.; Seol, S. K., 3D-printed NiFe-layered double hydroxide pyramid electrodes for enhanced electrocatalytic oxygen evolution reaction. *Scientific Reports* **2022**, *12* (1), 346.
- (5) Hou, X.; Li, J.; Zheng, J.; Li, L.; Chu, W., Introducing oxygen vacancies to NiFe LDH through electrochemical reduction to promote the oxygen evolution reaction. *Dalton Trans.* **2022**, *51* (36), 13970-13977.
- (6) Wen, Q.; Wang, S.; Wang, R.; Huang, D.; Fang, J.; Liu, Y.; Zhai, T., Nanopore-rich NiFe LDH targets the formation of the high-valent nickel for enhanced oxygen evolution reaction. *Nano Res.* **2023**, *16* (2), 2286-2293.
- (7) Gozzo, C. B.; Soares, M. R. S.; Destro, F. B.; Junior, J. B. S.; Leite, E. R., Facile deposition of NiFe-LDH ultrathin film on pyrolytic graphite sheet for oxygen evolution reaction in alkaline electrolyte. *Int. J. Hydrogen Energy* **2022**, *47* (14), 8786-8798.
- (8) Duan, M.; Qiu, M.; Sun, S.; Guo, X.; Liu, Y.; Zheng, X.; Cao, F.; Kong, Q.; Zhang, J., Intercalating assembly of NiFe LDH nanosheets/CNTs composite as high-performance electrocatalyst for oxygen evolution reaction. *Appl. Clay Sci.* **2022**, *216*, 106360.
- (9) Xu, Z.; Ying, Y.; Zhang, G.; Li, K.; Liu, Y.; Fu, N.; Guo, X.; Yu, F.; Huang, H., Engineering NiFe layered double hydroxide by valence control and intermediate stabilization toward the oxygen evolution reaction. *J. Mater. Chem. A* **2020**, *8* (48), 26130-26138.
- (10) Dong, Q.; Shuai, C.; Mo, Z.; Guo, R.; Liu, N.; Liu, G.; Wang, J.; Liu, W.; Chen, Y.; Liu, J.; Jiang, Y.; Gao, Q., The in situ derivation of a NiFe-LDH ultra-thin layer on Ni-BDC nanosheets as a boosted electrocatalyst for the oxygen evolution reaction. *CrystEngComm* **2021**, *23* (5), 1172-1180.
- (11) Wang, K.; Guo, J.; Zhang, H., Synergistic effect of nanosheet-array-like NiFe-LDH and reduced graphene oxide modified Ni foam for greatly enhanced oxygen evolution reaction and hydrogen evolution reaction. *Mater. Adv.* **2022**, *3* (17), 6887-6896.
- (12) Huang, J.; Li, K.; Wang, L.; She, H.; Wang, Q., In situ conversion builds MIL-101@NiFe-LDH heterojunction structures to enhance the oxygen evolution reaction. *Chin. Chem. Lett.* **2022**, *33* (8), 3787-3791.
- (13) Ibrahim, K. B.; Su, W. N.; Tsai, M. C.; Kahsay, A. W.; Chala, S. A.; Birhanu, M. K.; Lee, J. F.; Hwang, B. J., Heterostructured composite of NiFe-LDH nanosheets with Ti4O7 for oxygen evolution reaction. *Mater. Today Chem.* **2022**, *24*, 100824.

- (14) Luo, Y.; Wu, Y.; Wu, D.; Huang, C.; Xiao, D.; Chen, H.; Zheng, S.; Chu, P. K., NiFe-Layered Double Hydroxide Synchronously Activated by Heterojunctions and Vacancies for the Oxygen Evolution Reaction. *ACS Appl. Mater. Interfaces* **2020**, *12* (38), 42850-42858.
- (15) Zhang, P.; Chen, L.; Ge, L.; Song, P.; Xie, R.; Wang, B.; Fu, Y.; Jia, S.; Liao, T.; Xiong, Y., A 3D rGO-supported NiFe<sub>2</sub>O<sub>4</sub> heterostructure from sacrificial polymer-assisted exfoliation of NiFe-LDH for efficient oxygen evolution reaction. *Carbon* **2022**, *200*, 422-429.
